# Supplementary material for: Robust and Accurate Discrimination of Self/Non-Self Antigen Presentations by Regulatory T Cell Suppression
Source: PubMed Central journal article supplement (PMC5036821; doi:10.1371/journal.pone.0163134), 2016-09-26

Supporting Figure S1

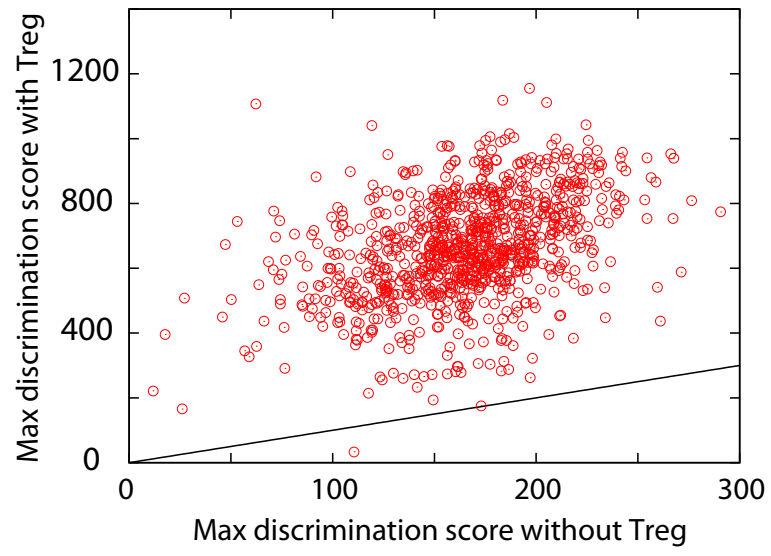

Supplement: pone.0163134.s002.pdf [file pone.0163134.s002.pdf]
